# Supplementary material for: Association between Residential Proximity to Fuel-Fired Power Plants and Hospitalization Rate for Respiratory Diseases
Source: PubMed Central journal article supplement (PMC3385425; doi:10.1289/ehp.1104146), 2012-02-27
Supplement: ehp.1104146.s001.pdf [file ehp.1104146.s001.pdf]

## **Supplemental Material**

### **Association between Residential Proximity to Fuel-Fired Power Plants and Hospitalization Rate for Respiratory Diseases**

Xiaopeng Liu <sup>1,2</sup>, Lawrence Lessner <sup>2</sup> and David O. Carpenter <sup>2,3</sup>

<sup>1</sup> Laboratory for Earth Surface Processes

College of Urban and Environmental Sciences

Peking University

Beijing 100871, China

<sup>2</sup> Institute for Health and the Environment

University at Albany

East Campus, Room A 217

Rensselaer, NY 12144

<sup>3</sup> Correspondence to:

David O. Carpenter, M.D.

Institute for Health and the Environment

University at Albany

5 University Place

Rensselaer, NY 12144

518-525-2660

FAX 518-525-2665

[dcarpenter@albany.edu](mailto:dcarpenter@albany.edu)

**Table S1.** Crude hospital discharge rates for zip codes with fuel-fired power plants according to fuel type.

| Age               | Fuel type<br>(No. of zip codes) | Hospital discharge rate, per 100,000 (95% CI) |                |                      |
|-------------------|---------------------------------|-----------------------------------------------|----------------|----------------------|
|                   |                                 | Asthma                                        | ARI            | COPD                 |
| Age <10           | Coal (10)                       | 464 (438, 491)                                | 528 (501, 557) |                      |
|                   | Gas (41)                        | 532 (520, 544)                                | 590 (577, 602) |                      |
|                   | LFG (19)                        | 269 (254, 285)                                | 310 (294, 327) |                      |
|                   | Oil (14)                        | 233 (210, 259)                                | 248 (225, 275) |                      |
|                   | Solid (11)                      | 451 (432, 471)                                | 455 (436, 475) |                      |
|                   | Coal+Gas (1)                    | 73 (25, 214)                                  | 316 (185, 541) |                      |
|                   | Coal+Oil (2)                    | 660 (585, 744)                                | 551 (484, 628) |                      |
|                   | Gas+Oil (17)                    | 527 (510, 545)                                | 560 (542, 578) |                      |
|                   | Gas+Solid (1)                   | 513 (459, 573)                                | 794 (726, 868) |                      |
|                   | LFG+Oil (2)                     | 292 (226, 377)                                | 347 (274, 439) |                      |
|                   | Coal+Gas+Oil (3)                | 820 (781, 861)                                | 870 (830, 912) |                      |
| Gas+Oil+Solid (1) | 500 (454, 552)                  | 443 (399, 492)                                |                |                      |
| Age ≥10           | Coal (10)                       | 602 (590, 614)                                | 184 (178, 191) | 1,483 (1,464, 1,503) |
|                   | Gas (41)                        | 723 (718, 729)                                | 212 (209, 215) | 1,852 (1,843, 1,861) |
|                   | LFG (19)                        | 486 (478, 494)                                | 141 (137, 145) | 1,303 (1,290, 1,316) |
|                   | Oil (14)                        | 438 (426, 450)                                | 135 (129, 142) | 1,248 (1,228, 1,268) |
|                   | Solid (11)                      | 657 (648, 666)                                | 181 (177, 186) | 1,427 (1,413, 1,440) |

[Table S1 Continued]

---

**Hospital discharge rate, per 100,000 (95% CI)**

---

| <b>Age</b> | <b>Fuel type<br/>(No. of zip codes)</b> | <b>Asthma</b>    | <b>ARI</b>     | <b>COPD</b>          |
|------------|-----------------------------------------|------------------|----------------|----------------------|
|            | Coal+Gas (1)                            | 220 (169, 287)   | 80 (52, 124)   | 761 (660, 877)       |
|            | Coal+Oil (2)                            | 447 (424, 471)   | 162 (148, 177) | 1,235 (1,196, 1,274) |
|            | Gas+Oil (17)                            | 713 (705, 721)   | 182 (178, 186) | 1,432 (1,421, 1,444) |
|            | Gas+Solid (1)                           | 690 (663, 719)   | 206 (191, 222) | 2,325 (2,274, 2,377) |
|            | LFG+Oil (2)                             | 951 (898, 1,008) | 186 (164, 212) | 2,345 (2,260, 2,433) |
|            | Coal+Gas+Oil (3)                        | 778 (762, 793)   | 243 (235, 252) | 1,586 (1,564, 1,609) |
|            | Gas+Oil+Solid (1)                       | 568 (547, 589)   | 129 (120, 139) | 1,355 (1,323, 1,387) |

---

**Table S2.** Crude comparison on hospital discharge rates between selected zip codes and excluded zip codes according to income<sup>a</sup>.

| Age     | MHI                        | Hospital discharge rate, per 100,000 (95% CI) |                |                      |
|---------|----------------------------|-----------------------------------------------|----------------|----------------------|
|         |                            | Asthma                                        | ARI            | COPD                 |
| Age <10 | < 23,057 <sup>b</sup>      | 804 (783, 825)                                | 670 (651, 690) |                      |
|         | 23,057-71,507 <sup>c</sup> | 435 (432, 438)                                | 480 (477, 484) |                      |
|         | > 71,507 <sup>d</sup>      | 249 (243, 255)                                | 260 (254, 266) |                      |
| Age ≥10 | < 23,057 <sup>b</sup>      | 1,106 (1,095, 1,116)                          | 275 (270, 281) | 1,695 (1,682, 1,708) |
|         | 23,057-71,507 <sup>c</sup> | 586 (585, 588)                                | 169 (168, 170) | 1,430 (1,428, 1,433) |
|         | > 71,507 <sup>d</sup>      | 412 (409, 414)                                | 110 (109, 112) | 927 (923, 931)       |

a. – all further analysis excluded zip codes with MHI <23,057 and >71,507

b. – including 118 zip codes: 81 clean, 2 fuel only, 31 waste only and 4 fuel and waste.

c. – including 1252 zip codes: 841 clean, 32 fuel only, 301 waste only and 78 fuel and waste.

d. – including 33 zip codes: 12 clean, 4 fuel only, 15 waste only and 2 fuel and waste.

**Table S3.** Stratified comparison of unadjusted hospital discharge rates for asthma, ARI and COPD by age, race/ethnicity and sex.

| Age     | Subpopulation | Exposure                    | Hospital discharge rate, per 100,000 (95% CI) |                |      |
|---------|---------------|-----------------------------|-----------------------------------------------|----------------|------|
|         |               |                             | Asthma                                        | ARI            | COPD |
| Age <10 | White-Female  | Clean <sup>a</sup>          | 232 (227, 236)                                | 315 (309, 320) |      |
|         |               | Fuel Only <sup>b</sup>      | 221 (203, 240)                                | 305 (284, 328) |      |
|         |               | Waste Only <sup>c</sup>     | 267 (262, 272)                                | 360 (354, 366) |      |
|         |               | Fuel and Waste <sup>d</sup> | 317 (308, 327)                                | 430 (419, 441) |      |
|         | White-Male    | Clean                       | 403 (397, 409)                                | 465 (458, 471) |      |
|         |               | Fuel only                   | 373 (350, 398)                                | 445 (420, 472) |      |
|         |               | Waste only                  | 471 (464, 478)                                | 515 (508, 522) |      |
|         |               | Fuel and Waste              | 528 (516, 539)                                | 595 (582, 607) |      |
|         | Black-Female  | Clean                       | 586 (561, 611)                                | 454 (433, 477) |      |
|         |               | Fuel only                   | 810 (716, 915)                                | 568 (491, 658) |      |

[Table S3. Continued]

| Age     | Subpopulation | Exposure       | Hospital discharge rate, per 100,000 (95% CI) |                |                      |
|---------|---------------|----------------|-----------------------------------------------|----------------|----------------------|
|         |               |                | Asthma                                        | ARI            | COPD                 |
|         |               | Waste only     | 760 (738, 783)                                | 603 (583, 623) |                      |
|         |               | Fuel and Waste | 766 (731, 803)                                | 657 (624, 692) |                      |
|         | Black-Male    | Clean          | 985 (953, 1,017)                              | 635 (610, 661) |                      |
|         |               | Fuel only      | 1,229 (1,115, 1,355)                          | 827 (734, 931) |                      |
|         |               | Waste only     | 1,198 (1,171, 1,226)                          | 801 (779, 824) |                      |
|         |               | Fuel and Waste | 1,317 (1,271, 1,364)                          | 919 (881, 959) |                      |
| Age ≥10 | White-Female  | Clean          | 629 (626, 632)                                | 164 (162, 165) | 1,224 (1,220, 1,229) |
|         |               | Fuel only      | 678 (667, 690)                                | 170 (164, 176) | 1,422 (1,405, 1,439) |
|         |               | Waste only     | 714 (711, 717)                                | 184 (182, 186) | 1,435 (1,430, 1,439) |
|         |               | Fuel and Waste | 818 (812, 823)                                | 215 (212, 218) | 1,725 (1,717, 1,733) |
|         | White-Male    | Clean          | 315 (313, 317)                                | 120 (119, 122) | 1,302 (1,298, 1,306) |
|         |               | Fuel only      | 345 (336, 353)                                | 126 (121, 131) | 1,459 (1,441, 1,477) |
|         |               | Waste only     | 336 (334, 339)                                | 133 (132, 134) | 1,462 (1,457, 1,466) |
|         |               | Fuel and Waste | 373 (369, 377)                                | 150 (147, 152) | 1,681 (1,673, 1,689) |

**[Table S3. Continued]**

| Age | Subpopulation | Exposure          | Hospital discharge rate, per 100,000 (95% CI) |                |                  |
|-----|---------------|-------------------|-----------------------------------------------|----------------|------------------|
|     |               |                   | Asthma                                        | ARI            | COPD             |
|     |               | Fuel only         | 1,592 (1,533, 1,653)                          | 257 (234, 282) | 776 (735, 819)   |
|     |               | Waste only        | 1,668 (1,653, 1,683)                          | 299 (293, 305) | 910 (899, 921)   |
|     |               | Fuel and<br>Waste | 1,769 (1,744, 1,795)                          | 319 (308, 330) | 902 (884, 920)   |
|     | Black-Male    | Clean             | 632 (621, 644)                                | 164 (158, 169) | 678 (667, 690)   |
|     |               | Fuel only         | 675 (635, 718)                                | 176 (156, 199) | 894 (848, 942)   |
|     |               | Waste only        | 768 (757, 778)                                | 214 (209, 220) | 997 (985, 1,009) |
|     |               | Fuel and<br>Waste | 852 (834, 870)                                | 229 (220, 238) | 885 (867, 904)   |

- a. Clean – zip code containing neither a fuel-fired power plant nor a hazardous waste site;
- b. Fuel only – zip code containing a fuel-fired power plant, without a waste site;
- c. Waste only – zip code containing a hazardous waste site, without a fuel-fired power plant;
- d. Fuel and waste – zip code containing both a fuel-fired power plant and a hazardous waste site.

**Table S4.** Adjusted rate ratios of hospital discharge in relation to gender, race/ethnicity, age, MHI and urban/rural residence for individuals <10 and ≥10 years of age.

| Parameter        | <i>Asthma</i>     |                 |                   |                 | <i>ARI</i>        |                 |                    |                 | <i>COPD</i>       |                 |
|------------------|-------------------|-----------------|-------------------|-----------------|-------------------|-----------------|--------------------|-----------------|-------------------|-----------------|
|                  | < 10 years old    |                 | ≥ 10 years old    |                 | < 10 years old    |                 | ≥ 10 years old     |                 | ≥ 10 years old    |                 |
|                  | RR (95% CI)       | <i>p</i> -Value | RR (95% CI)       | <i>p</i> -Value | RR (95% CI)       | <i>p</i> -Value | RR (95% CI)        | <i>p</i> -Value | RR (95% CI)       | <i>p</i> -Value |
| <b>Gender</b>    |                   |                 |                   |                 |                   |                 |                    |                 |                   |                 |
| Female           | 1.00              |                 | 1.88 (1.79, 1.97) | <0.0001         | 1.00              |                 | 1.28 (1.22, 1.36)  | <0.0001         | 1.00              | <0.0001         |
| Male             | 1.68 (1.59, 1.77) | <.0001          | 1.00              |                 | 1.40 (1.33, 1.48) | <0.0001         | 1.00               |                 | 1.21 (1.14, 1.28) |                 |
| <b>Race</b>      |                   |                 |                   |                 |                   |                 |                    |                 |                   |                 |
| African American | 2.31 (2.19, 2.44) | <0.0001         | 2.16 (2.06, 2.67) | <0.0001         | 1.43 (1.35, 1.51) | <0.0001         | 1.694 (1.60, 1.79) | <0.0001         | 1.05 (0.99, 1.12) | 0.09            |
| Caucasian        | 1.00              |                 | 1.00              |                 | 1.00              |                 | 1.00               |                 | 1.00              |                 |
| <b>Age</b>       |                   |                 |                   |                 |                   |                 |                    |                 |                   |                 |
| 0                | 1.00              |                 |                   |                 | 1.00              |                 |                    |                 |                   |                 |
| 1-2              | 1.14 (1.06, 1.24) | 0.0007          |                   |                 | 0.23 (0.22, 0.25) | <0.0001         |                    |                 |                   |                 |
| 3-5              | 0.66 (0.61, 0.71) | <0.0001         |                   |                 | 0.06 (0.06, 0.07) | <0.0001         |                    |                 |                   |                 |
| 6-9              | 0.40 (0.37, 0.43) | <0.0001         |                   |                 | 0.03 (0.02, 0.03) | <0.0001         |                    |                 |                   |                 |
| 10-24            |                   |                 | 1.00              |                 |                   |                 | 1.00               |                 | 1.00              |                 |



[Table S4. Continued]

| Parameter           | <i>Asthma</i>     |                 |                   |                 | <i>ARI</i>        |                 |                   |                 | <i>COPD</i>             |                 |
|---------------------|-------------------|-----------------|-------------------|-----------------|-------------------|-----------------|-------------------|-----------------|-------------------------|-----------------|
|                     | < 10 years old    |                 | ≥ 10 years old    |                 | < 10 years old    |                 | ≥ 10 years old    |                 | ≥ 10 years old          |                 |
| Age                 | RR (95% CI)       | <i>p</i> -Value | RR (95% CI)       | <i>p</i> -Value | RR (95% CI)       | <i>p</i> -Value | RR (95% CI)       | <i>p</i> -Value | RR (95% CI)             | <i>p</i> -Value |
| 50-74               |                   |                 | 2.69 (2.52, 2.88) | <0.0001         |                   |                 | 2.83 (2.62, 3.06) | <0.0001         | 172.07 (156.71, 188.92) | <0.0001         |
| ≥ 75                |                   |                 | 3.87 (3.62, 4.15) | <0.0001         |                   |                 | 7.79 (7.20, 8.42) | <0.0001         | 582.72 (530.44, 640.08) | <0.0001         |
| <b>Income</b>       |                   |                 |                   |                 |                   |                 |                   |                 |                         |                 |
| 1Q MHI              | 1.42 (1.31, 1.53) | <0.0001         | 1.43 (1.34, 1.52) | <0.0001         | 1.55 (1.44, 1.67) | <0.0001         | 1.59 (1.47, 1.71) | <0.0001         | 1.84 (1.69, 1.99)       | <0.0001         |
| 2Q MHI              | 1.14 (1.06, 1.23) | 0.001           | 1.21 (1.14, 1.30) | <0.0001         | 1.25 (1.16, 1.35) | <0.0001         | 1.43 (1.32, 1.54) | <0.0001         | 1.38 (1.27, 1.50)       | <0.0001         |
| 3Q MHI              | 1.12 (1.04, 1.21) | 0.004           | 1.18 (1.10, 1.26) | <0.0001         | 1.26 (1.17, 1.36) | <0.0001         | 1.32 (1.22, 1.42) | <0.0001         | 1.29 (1.19, 1.40)       | <0.0001         |
| 4Q MHI              | 1.00              |                 | 1.00              |                 | 1.00              |                 | 1.00              |                 | 1.00                    |                 |
| <b>Urban/ Rural</b> |                   |                 |                   |                 |                   |                 |                   |                 |                         |                 |
| Urban               | 1.07 (1.01, 1.13) | 0.02            | 1.16 (1.11, 1.22) | <0.0001         | 0.95 (0.90, 1.01) | 0.07            | 1.00 (0.94, 1.05) | 0.87            | 0.95 (0.89, 1.01)       | 0.07            |
| Rural               | 1.00              |                 | 1.00              |                 | 1.00              |                 | 1.00              |                 | 1.00                    |                 |

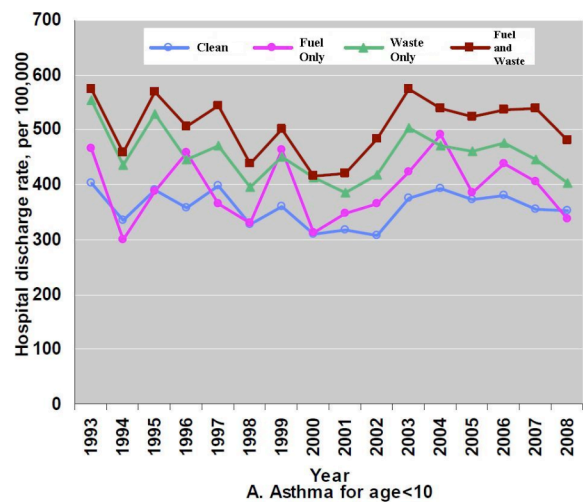

A. Asthma for age <10

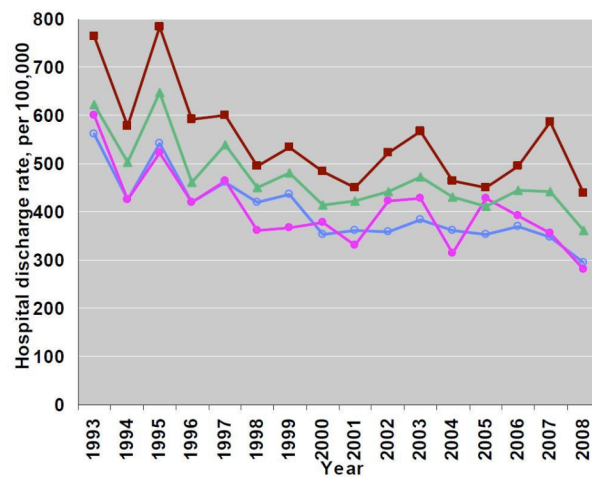

B. ARI for age <10

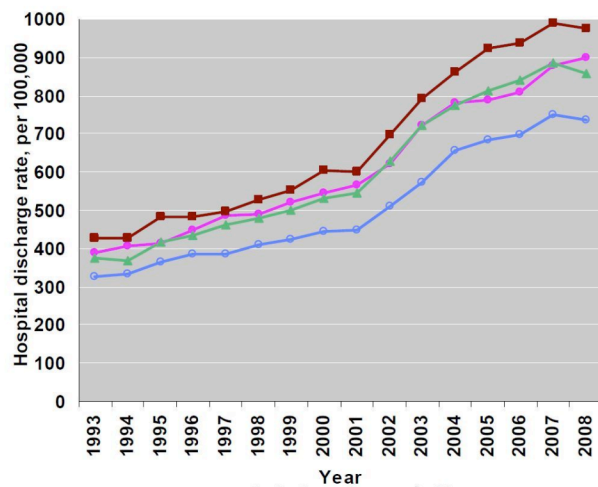

C. Asthma for age  $\geq 10$

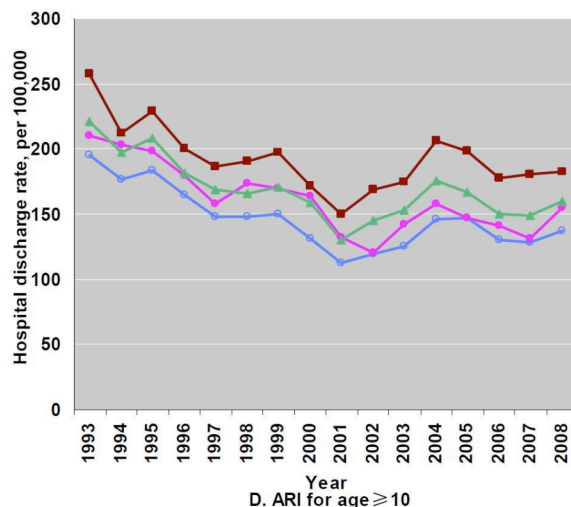

D. ARI for age  $\geq 10$

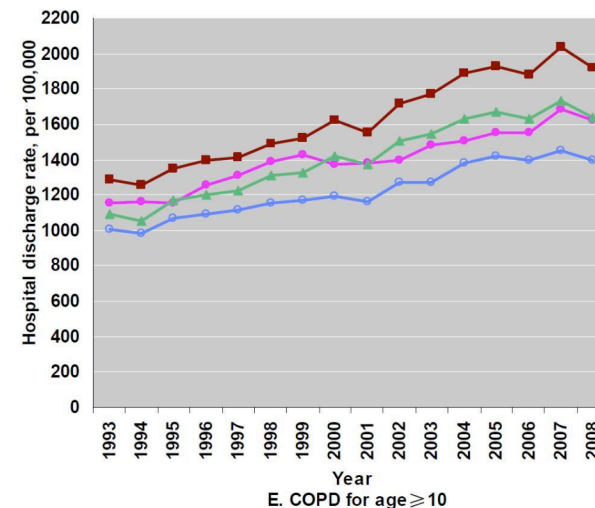

E. COPD for age  $\geq 10$

Figure S1. Time-series analysis on annual hospital discharge rate in 1993-2008 according to exposure.

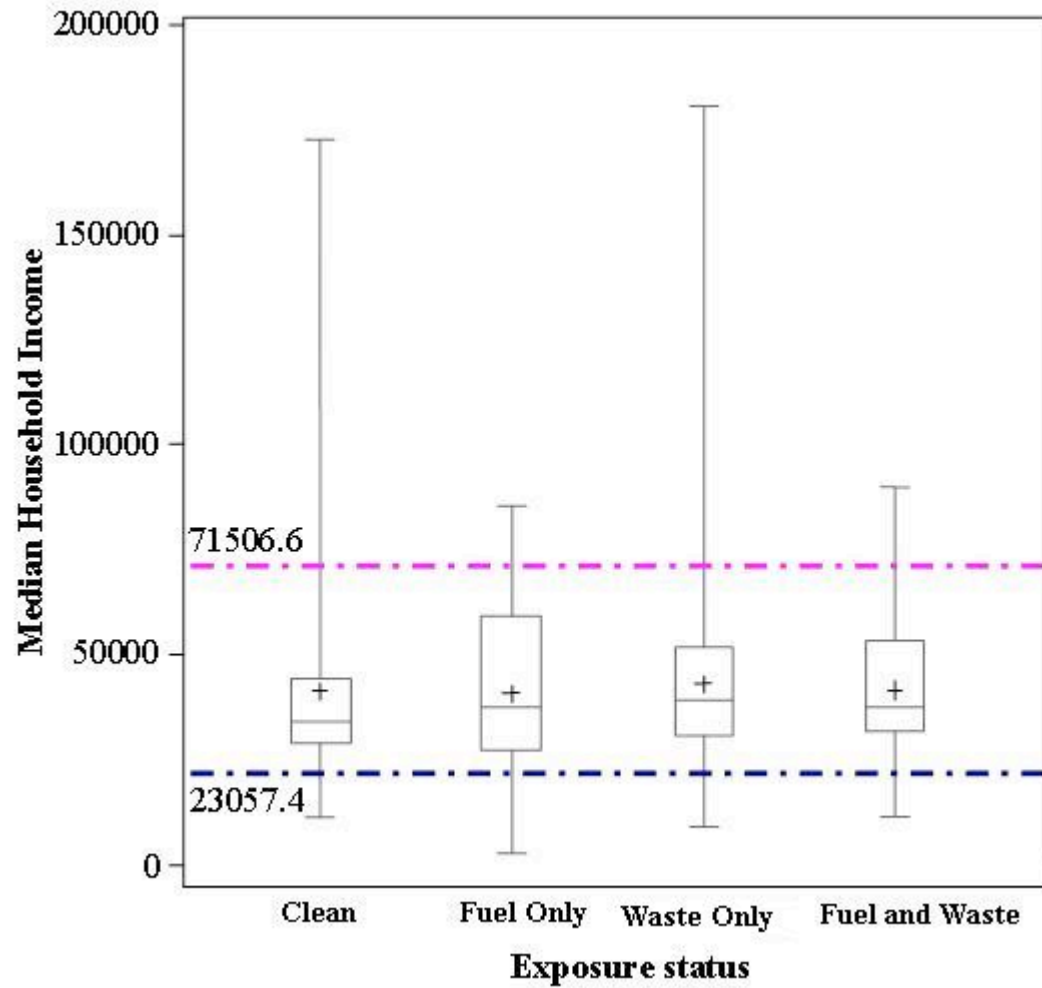

Figure S2. Comparison of MHIs according to exposure, indicating that the distribution of MHI in zip codes containing a fuel-fired power plant is not as dispersive as others.
